## Viewpoints

# *Mycobacterium ulcerans* and Other Mycolactone-Producing Mycobacteria Should Be Considered a Single Species

Sacha J. Pidot<sup>1,2</sup>, Kingsley Asiedu<sup>3</sup>, Michael Käser<sup>4,5</sup>, Janet A. M. Fyfe<sup>6</sup>, Timothy P. Stinear<sup>1,2\*</sup>

**1** Department of Microbiology and Immunology, University of Melbourne, Melbourne, Australia, **2** Department of Microbiology, Monash University, Clayton, Australia, **3** World Health Organization, Geneva, Switzerland, **4** Swiss Tropical and Public Health Institute, Basel, Switzerland, **5** University of Basel, Basel, Switzerland, **6** Victorian Infectious Diseases Reference Laboratory, North Melbourne, Australia

The nomenclature of *Mycobacterium ulcerans* has become confused with the discovery that other mycobacteria that are not necessarily associated with Buruli ulcer also produce the lipid toxin mycolactone. These mycobacteria—collectively known as mycolactone-producing mycobacteria (MPM)—have been given a variety of species names, including *Mycobacterium shinshuense*, *Mycobacterium pseudoshottsii*, *Mycobacterium marinum*, and *Mycobacterium liflandii*. Here we highlight the fact that all MPM share sufficient phenotypic and genotypic characteristics such that they should all be formally recognised as *M. ulcerans* and not separate species. Renaming all MPM as *M. ulcerans* is taxonomically correct and will resolve the confusion that is prevalent in the field and will assist political and financial advocacy for Buruli ulcer.

Defining a bacterial species has become an increasingly difficult task, particularly when bacteria exhibit different phenotypes but are genetically very closely related. Genomics has shown us very clearly that subtle genetic differences between bacteria can result in impressive phenotypic differences. It is not surprising that the expansion of bacterial genomics has led to a reassessment of the taxonomy of many bacterial species.

Such is the case with *M. ulcerans*, *M. marinum*, and other closely associated mycobacteria. *M. ulcerans* and *M. marinum* are genetically related species that cause quite different human skin diseases. *M. ulcerans* causes Buruli ulcer, a disease characterised by chronic and severe skin ulcers. The bacterium produces a lipid toxin called mycolactone, replicates slowly (doubling time >48 h) [1], and is apigmented. In contrast, *M. marinum* causes relatively minor granulomatous skin lesions, often referred to as “fish tank granulomas”, has a doubling time of 6–11 h, and produces bright yellow pigments when exposed to light. Despite their widely different phenotypes, genome com-

parisons have shown that these species share over 4,000 genes with 98.3% average DNA sequence identity [2]. However, there are also some important genetic differences between them. DNA–DNA hybridisation (DDH) analysis confirmed their status as distinct species, as inter-species relative hybridisation ratios (RBR) were less than 40% [3,4]. The low RBR is explained by a number of features unique to *M. ulcerans*, such as the presence of a large virulence plasmid (pMUM) required for mycolactone production, and multiple copies of the insertion sequence element IS2404 that itself accounts for 6% of the *M. ulcerans* genome [2,5].

Mycobacteria isolated recently from humans, fish, and frogs around the world (including Japan, the Mediterranean Sea, the Red Sea, Belgium, and the United States) have been variously called *M. shinshuense*, *M. marinum*, *M. pseudoshottsii*, or given unofficial names such as *M. “liflandii”* [6–10]. Subsequent studies have used the collective term MPM when describing *M. ulcerans* and these bacteria, as they all produce a form of mycolactone [5,11]. Phylogenetic studies of more than 50 *M. ulcerans*, other MPM, and *M. marinum* strains, based on multi-locus sequence analysis (MLSA) of chromosomal and pMUM sequences and studies of large DNA InDel polymorphisms, indicate that all MPM have likely evolved from a

common *M. marinum* progenitor [5,11,12] and have then diverged again into two distinct lineages, with both lineages bearing strains that cause Buruli ulcer [5,13] (Figure 1).

The new species assignments for MPM have not considered their genomic context and have been based on variable phenotypic characteristics (such as colony morphology and in vitro growth rates) and limited, monophyletic rRNA, *hsp65*, or *rpoB* analyses, which have shown these mycobacteria have a few unique nucleotide sequences when compared to a small number of allele sequences in GenBank. However, more complex and time-consuming DDH analyses, which, together with 16S rRNA sequencing, are the prescribed methods for defining a prokaryotic species [14], were not performed in these studies. In the only study to utilise DDH to investigate the relationship between recently described MPM and *M. marinum*, Yip et al. (2007) showed that MPM have an RBR of 88%–100% when compared to *M. ulcerans* strains from Africa and Australia and only 15%–60% RBR when compared with a genetically diverse range of nonmycolactone-producing *M. marinum* strains [5] (Table 1). Furthermore, the analysis of large sequence polymorphisms down to the exact nucleotide breakpoints also showed clear clustering of strains that have been assigned different

**Citation:** Pidot SJ, Asiedu K, Käser M, Fyfe JAM, Stinear TP (2010) *Mycobacterium ulcerans* and Other Mycolactone-Producing Mycobacteria Should Be Considered a Single Species. PLoS Negl Trop Dis 4(7): e663. doi:10.1371/journal.pntd.0000663

**Editor:** Richard O. Phillips, Kwame Nkrumah University of Science and Technology (KNUST) School of Medical Sciences, Ghana

**Published:** July 27, 2010

**Copyright:** © 2010 Pidot et al. This is an open-access article distributed under the terms of the Creative Commons Attribution License, which permits unrestricted use, distribution, and reproduction in any medium, provided the original author and source are credited.

**Funding:** This research was supported in part by the National Health and Medical Research Council of Australia. The funders had no role in study design, data collection and analysis, decision to publish, or preparation of the manuscript.

**Competing Interests:** The authors have declared that no competing interests exist.

\* E-mail: tsteinar@unimelb.edu.au

<3% nucleotide variation amongst *M. marinum* and all mycolactone producing mycobacteria

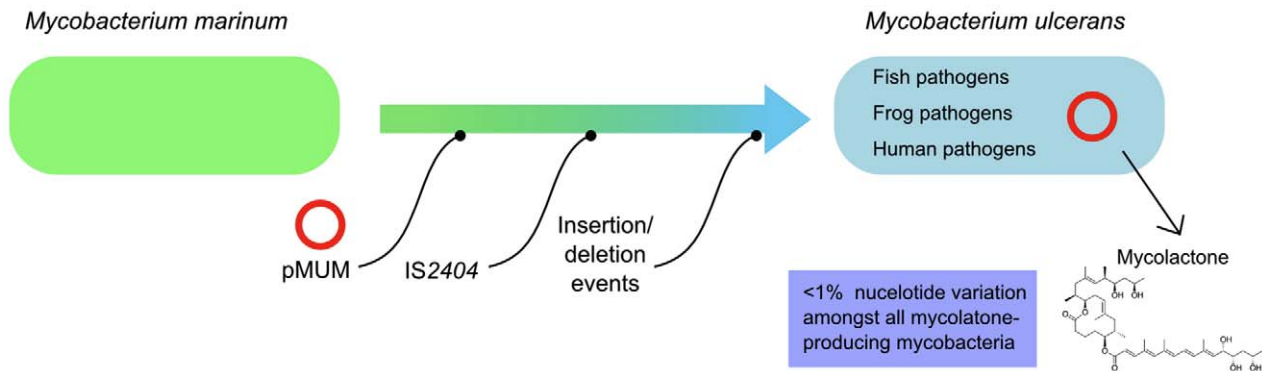

**Figure 1. Overview of the evolution and principal species-defining features of *Mycobacterium ulcerans* as established by multi-locus sequence and genome deletion analysis.**  
doi:10.1371/journal.pntd.0000663.g001

species names, rendering these assignments inadequate [11].

A species is defined as “...a category that circumscribes a (preferably) genomically coherent group of individual isolates/strains sharing a high degree of similarity in (many) independent features, comparatively tested under highly standardized conditions” [15]. In practice, a prokaryotic species is considered to be a group of strains (including the type strain) that is characterised by a certain degree of phenotypic consistency, showing greater than 97% 16S rRNA gene-sequence identity and greater than 70% DDH [16]. If these criteria are applied to the MPM, all of which are “genomically coherent” as revealed by MLSA and InDel analysis, have >98% 16S rRNA identity to *M. ulcerans*, >70% DDH, possess pMUM plasmids, contain IS2404,

and make mycolactone, they can clearly be considered as variants of the same species, namely *M. ulcerans*. It is on this solid genetic and phenotypic basis that we propose all MPM should be considered strains of *M. ulcerans*. Furthermore, we suggest that characteristics such as growth rate, colony morphology, pigment production, enzymatic activity, antibiotic susceptibility, and pathogenicity are useful traits for characterizing a particular mycobacterium, but are too sensitive for reliably defining a new taxon. Defining mycobacteria that satisfy our proposed diagnostic criteria as outlined in Table 1 as *M. ulcerans* will greatly simplify the nomenclature and alleviate confusion. It does not matter that under this revised naming scheme some strains of *M. ulcerans* will not be associated with human disease. Indeed, many MPM, such as *M. pseu-*

*doshottsi*, have only been associated with disease in animals other than humans; however, they still present the same consistent genetic signatures to assign them as strains of *M. ulcerans*. Furthermore, the extent of *M. ulcerans* recovered from humans to also cause disease in other animals, including koalas, possums, cats, and horses, is now being realised [17,18]. These factors demonstrate how pathogenicity or host range of a bacterium is not a useful parameter for defining a species.

Reclassifying all MPM as *M. ulcerans* is more than an academic exercise. It will also highlight both the large geographic distribution and broad host range of this organism. Advocacy for a neglected tropical disease is not helped with confusion about the name of the causative organism. For example, renaming *M. shinshuense* to

**Table 1. The Key Characteristics That Define *Mycobacterium ulcerans*.**

| Current Name                 | Source                                                               | RBR to <i>M. marinum</i> [5] | RBR <sup>a</sup> to MU Agy99 [5] | High Copy IS2404 | pMUM Plasmid | Mycolactone Produced (Type) | <i>M. ulcerans</i> (Yes/No) |
|------------------------------|----------------------------------------------------------------------|------------------------------|----------------------------------|------------------|--------------|-----------------------------|-----------------------------|
| <i>M. ulcerans</i> Agy99     | Human clinical isolate, Ghana                                        | 52%                          | 100%                             | +                | +            | + A/B                       | Yes                         |
| <i>M. shinshuense</i> 753    | Human clinical isolate, Japan                                        | 29%                          | 94%                              | +                | +            | + (A/B)                     | Yes                         |
| <i>M. pseudoshottsi</i> L15  | Striped bass ( <i>Morone saxatilis</i> ), US                         | 41%                          | 98%                              | +                | +            | + (F)                       | Yes                         |
| <i>M. marinum</i> CC240299   | Koi ( <i>Cyprinus carpio</i> ), Israel                               | 39%                          | 100%                             | +                | +            | + (F)                       | Yes                         |
| <i>M. marinum</i> DL240490   | European sea bass ( <i>Dicentrarchus labrax</i> ), Red Sea           | 37%                          | 91%                              | +                | +            | + (F)                       | Yes                         |
| <i>M. marinum</i> DL045      | European sea bass ( <i>Dicentrarchus labrax</i> ), Mediterranean Sea | 32%                          | 94%                              | +                | +            | + (F)                       | Yes                         |
| <i>M. “liflandii”</i> 128FXT | African tropical clawed frog ( <i>Xenopus tropicalis</i> ), US       | 33%                          | 100%                             | +                | +            | + (E)                       | Yes                         |
| <i>M. marinum</i> M          | Human clinical isolate, US                                           | 100%                         | 52%                              | -                | -            | -                           | No                          |

<sup>a</sup>RBR, relative binding ratio, derived from DNA–DNA hybridisation experiments.  
doi:10.1371/journal.pntd.0000663.t001

*M. ulcerans* would assist efforts to raise awareness about Buruli ulcer in Japan. Similarly, highlighting the fact that *M.*

*ulcerans* is found around the world, including Europe and the US, can only help promote research in this field and encour-

age broader community interest in Buruli ulcer.

## References

1. Marsollier L, Stinear T, Aubry J, Saint Andre JP, Robert R, et al. (2004) Aquatic plants stimulate the growth of and biofilm formation by *Mycobacterium ulcerans* in axenic culture and harbor these bacteria in the environment. *Appl Environ Microbiol* 70: 1097–1103.
2. Stinear TP, Seemann T, Pidot S, Frigui W, Reysset G, et al. (2007) Reductive evolution and niche adaptation inferred from the genome of *Mycobacterium ulcerans*, the causative agent of Buruli ulcer. *Genome Res* 17: 192–200.
3. Tonjum T, Welty DB, Jantzen E, Small PL (1998) Differentiation of *Mycobacterium ulcerans*, *M. marinum*, and *M. haemophilum*: mapping of their relationships to *M. tuberculosis* by fatty acid profile analysis, DNA-DNA hybridization, and 16S rRNA gene sequence analysis. *J Clin Microbiol* 36: 918–925.
4. Portaels F, Fonteyne PA, de Beenhouwer H, de Rijk P, Guedenon A, et al. (1996) Variability in 3' end of 16S rRNA sequence of *Mycobacterium ulcerans* is related to geographic origin of isolates. *J Clin Microbiol* 34: 962–965.
5. Yip MJ, Porter JL, Fyfe JA, Lavender CJ, Portaels F, et al. (2007) Evolution of *Mycobacterium ulcerans* and other mycolactone-producing mycobacteria from a common *Mycobacterium marinum* progenitor. *J Bacteriol* 189: 2021–2029.
6. Mve-Obiang A, Lee RE, Portaels F, Small PL (2003) Heterogeneity of mycolactones produced by clinical isolates of *Mycobacterium ulcerans*: implications for virulence. *Infect Immun* 71: 774–783.
7. Kazumi Y, Ohtomo K, Takahashi M, Mitarai S, Sugawara I, et al. (2004) *Mycobacterium shinshuense* isolated from cutaneous ulcer lesion of right lower extremity in a 37-year-old woman. *Kekkaku* 79: 437–441.
8. Ucko M, Colorni A, Kvitt H, Diamant A, Zlotkin A, et al. (2002) Strain variation in *Mycobacterium marinum* fish isolates. *Appl Environ Microbiol* 68: 5281–5287.
9. Rhodes MW, Kator H, McNabb A, Deshayes C, Reyrat JM, et al. (2005) *Mycobacterium pseudoshottsii* sp. nov., a slowly growing chromogenic species isolated from Chesapeake Bay striped bass (*Morone saxatilis*). *Int J Syst Evol Microbiol* 55: 1139–1147.
10. Stragier P, Hermans K, Stinear T, Portaels F (2008) First report of a mycolactone-producing *Mycobacterium* infection in fish agriculture in Belgium. *FEMS Microbiol Lett* 286: 93–95.
11. Kaser M, Hauser J, Small P, Pluschke G (2009) Large sequence polymorphisms unveil phylogenetic relationship of environmental and pathogenic mycobacteria related to *Mycobacterium ulcerans*. *Appl Environ Microbiol* 75: 5667–5675.
12. Stinear TP, Jenkin GA, Johnson PD, Davies JK (2000) Comparative genetic analysis of *Mycobacterium ulcerans* and *Mycobacterium marinum* reveals evidence of recent divergence. *J Bact* 182: 6322–6330.
13. Kaser M, Rondini S, Naegeli M, Stinear T, Portaels F, et al. (2007) Evolution of two distinct phylogenetic lineages of the emerging human pathogen *Mycobacterium ulcerans*. *BMC Evol Biol* 7: 177.
14. Stackebrandt E, Frederiksen W, Garrity GM, Grimont PA, Kämpfer P, et al. (2002) Report of the ad hoc committee for the re-evaluation of the species definition in bacteriology. *Int J Syst Evol Microbiol* 52: 1043–1047.
15. Rossello-Mora R, Amann R (2001) The species concept for prokaryotes. *FEMS Microbiol Rev* 25: 39–67.
16. Vandamme P, Pot B, Gillis M, de Vos P, Kersters K, et al. (1996) Polyphasic taxonomy, a consensus approach to bacterial systematics. *Microbiol Rev* 60: 407–438.
17. Portaels F, Chemlal K, Elsen P, Johnson PD, Hayman JA, et al. (2001) *Mycobacterium ulcerans* in wild animals. *Rev Sci Tech* 20: 252–264.
18. Elsner L, Wayne J, O'Brien CR, McCowan C, Malik R, et al. (2008) Localised *Mycobacterium ulcerans* infection in a cat in Australia. *J Feline Med Surg* 10: 407–412.
